# Supplementary material for: Stereoisomerism metabolites found in rats after oral administration of timosaponin B-II using HPLC-Q-TOF-MS and NMR methods
Source: Royal Society of Chemistry journal article supplement (doi:10.1039/c5ra09133k), 2015-01-01
Supplement: c5ra09133k1.pdf [file c5ra09133k1.pdf]

1 **Electronic Supplementary Materials**

2 **Stereoisomerism metabolites found in rats after oral administration of timosaponin B-II**

3 **using HPLC-Q-TOF-MS and NMR method**

4 Zhiwen Fu<sup>†a,b</sup>, Zhixiong Li<sup>†a</sup>, Rui Xue<sup>a</sup>, Jian Jiang<sup>b\*</sup>, Chenggang Huang<sup>a\*</sup>

5

6 <sup>a</sup> Shanghai Institute of Materia Medica, Chinese Academy of Sciences, Shanghai 201203, P.R.

7 China

8 <sup>b</sup> Shuguang Hospital affiliated to Shanghai University of Traditional Chinese Medicine, Shanghai

9 201203, P.R. China

10

11

12 \*Correspondence to:

13 Chenggang Huang, Shanghai Insititute of Materia Medica, Chinese Academy of Science, 501

14 Haike Rd., ZhangJiang, Pudong, Shanghai 201203, P.R. China. E-mail: [cghsimm2309@126.com](mailto:cghsimm2309@126.com).

15 Jian Jiang, Shuguang Hospital affiliated to Shanghai University of Traditional Chinese Medicine,

16 528 Zhangheng Rd., Shanghai 201203, P.R. China. E-mail: [Jianjiangsg@126.com](mailto:Jianjiangsg@126.com).

17

18 † These two authors contributed equally to the work

19

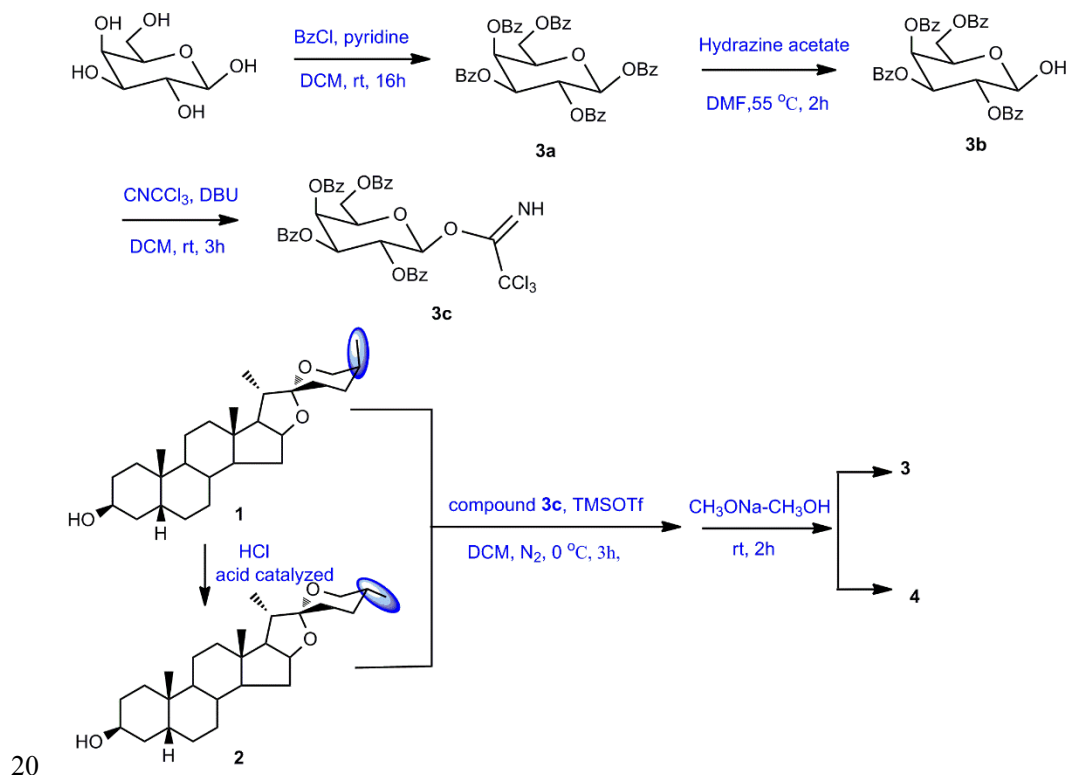

21 Scheme 1. Synthetic pathway for obtaining deglycosylated spirostanol metabolites: compounds 1-

22 4.

23

## 24 1. Synthesis of some derivates

### 25 1.1 Sarsasapogenin (1)

26 The dried and powdered extract of *Rhizoma anemarrhenae* (100 g) was dissolved in 95% EtOH (800

27 mL) and concentrated HCl (200 mL), the resulting solution was stirred and refluxed at  $100^\circ\text{C}$  for 2 h.

28 Then, the reaction solution was poured into cooled water (1 L) and filtered to obtain the precipitate.

29 The deposit was washed with demineralized water, and dried under vacuum to obtain the crude product

30 (4.0 g), which was recrystallized from acetone two times to yield sarsasapogenin (1.0 g).

31 White crystalline needle;  $^1\text{H-NMR}$  (400 MHz, chloroform-*d*),  $\delta_{\text{H}}$  (ppm): 4.40 (td,  $J = 7.9, 7.3, 6.2$

32 Hz, 1H, H-16), 4.10 (brs, 1H, H-3), 3.94 (dd,  $J = 11.0, 2.8$  Hz, 1H, H-26), 3.29 (d,  $J = 10.9$  Hz, 1H, H-

33 26), 1.07 (d,  $J = 7.1$  Hz, 3H, H-21), 0.98 (d,  $J = 6.4$  Hz, 3H, H-27), 0.97 (s, 3H, H-19), 0.75 (s, 3H, H-

34 18);  $^{13}\text{C}$ -NMR (100 MHz, chloroform-*d*),  $\delta_{\text{C}}$  (ppm): 109.9 (C-22), 81.2 (C-16), 67.2 (C-3), 65.3 (C-26),  
35 62.2 (C-17), 56.6 (C-14), 42.3 (C-20), 40.8 (C-13), 40.5 (C-12), 40.0 (C-9), 36.7 (C-5), 35.4 (C-8),  
36 35.4 (C-10), 33.7 (C-4), 31.9 (C-15), 30.1 (C-1), 28.0 (C-23), 27.2 (C-25), 26.7 (C-7), 26.7 (C-6), 26.1  
37 (C-2), 25.9 (C-24), 24.1 (C-19), 21.0 (C-11), 16.6 (C-27), 16.2 (C-18), 14.5 (C-21); positive-ion HR-  
38 ESI/MS  $m/z$ : 417.3365 for  $[\text{M}+\text{H}]^+$  (calcd. for  $\text{C}_{27}\text{H}_{45}\text{O}_3^+$ , 417.3363).

### 39 **1.2 Isosarsasapogenin (2)**

40 To a boiling solution of 5 g of sarsasapogenin in 500 mL of 95% ethanol was added a mixture of 300  
41 mL of 95% EtOH and 150 mL of concentrated hydrochloric acid. After refluxing for 40 h on the oil-  
42 bathing, 100 mL concentrated hydrochloric acid was added and the refluxing continued for an  
43 additional 10 h. The solution was then poured into water and the resulting mixture was extracted with  
44 ether. The ether extract was washed with water, evaporated and removed. The residue was crystallized  
45 from acetone to give white needle crystals.

46 White crystalline needle;  $^1\text{H}$ -NMR (400 MHz, chloroform-*d*),  $\delta_{\text{H}}$  (ppm): 4.37 (td,  $J = 8.2, 7.5, 6.4$   
47 Hz, 1H, H-16), 4.08 (brs, 1H, H-3), 3.45 (dd,  $J = 11.0, 2.0$  Hz, 1H, H-26), 3.35 (d,  $J = 10.8$ , 1H, H-26),  
48 0.96 (s, 3H, H-19), 0.94 (d,  $J = 6.9$  Hz, 3H, H-21), 0.77 (d,  $J = 6.2$  Hz, 3H, H-27), 0.74 (s, 3H, H-18);  
49  $^{13}\text{C}$ -NMR (100 MHz, chloroform-*d*),  $\delta_{\text{C}}$  (ppm): 109.4 (C-22), 81.0 (C-16), 67.2 (C-3), 67.0 (C-26), 62.4  
50 (C-17), 56.6 (C-14), 41.7 (C-20), 40.8 (C-13), 40.4 (C-12), 40.0 (C-9), 36.6 (C-5), 35.4 (C-8), 35.4 (C-  
51 10), 33.6 (C-4), 31.9 (C-15), 31.5 (C-23), 30.4 (C-25), 30.1 (C-1), 28.9 (C-24), 27.9 (C-2), 26.7 (C-7),  
52 26.7 (C-6), 24.0 (C-19), 21.0 (C-11), 17.2 (C-27), 16.6 (C-18), 14.6 (C-21); positive-ion HR-ESI/MS  
53  $m/z$ : 417.3366  $[\text{M}+\text{H}]^+$  (calcd. for  $\text{C}_{27}\text{H}_{45}\text{O}_3^+$ , 417.3363).

### 54 **1.3 Galactosyl trichloroacetimidate (3c)**

55 To a magnetically stirred solution of galactose (5.0 g, 27.8 mmol) in anhydrous pyridine (100 mL) and

56 DMF (200 mL), benzoyl chloride (17.8 mL, 152.4 mmol) was added dropwise under ice bath. The  
57 reaction continued for 16 h after naturally rising to room temperature. Then the solution was extracted  
58 with EtOAc (150 mL\*3) following water (50 mL) was added into the mixture to quench the excess  
59 benzoyl chloride. The organic layer was merged and washed with water, diluted hydrochloric acid,  
60 water, saturated NaHCO<sub>3</sub> solution and water in sequence. Afterwards, it was concentrated to dryness  
61 under reduced pressure and used as the material for next step without purification, compound **3a**.

62 Compound **3a** (15.0 g, 21.5 mmol) was dissolved in dry DMF (100 mL), and then the hydrazine  
63 acetate (2.5 g 27 mmol) was added. After stirred at 55 °C for 1.5 h, the flask was cooled to room  
64 temperature with running water. The solution was extracted with EtOAc and washed with saline  
65 solution, and then the organic layer was separated out and concentrated to dryness under reduced  
66 pressure. Finally, the residue was purified by column chromatography over the silica gel with  
67 petroleum ether-ethyl acetate (5:1) to yield the white power, compound **3b** (9.6 g, yield 75%).

68 The DBU (0.55 mL, 5.8 mmol) was added to the solution of compound **3b** (5.0 g, 8.3 mmol) and  
69 CNCCl<sub>3</sub> (5 mL, 50.7 mmol) in anhydrous CH<sub>2</sub>Cl<sub>2</sub> (70 mL) at room temperature. Then, the mixture was  
70 continued to stir until the compound **3b** was not observed by TLC. The crude products were obtained  
71 by removing the solvent, which were purified by column chromatography over the silica gel with  
72 petroleum ether-ethyl acetate (10:1, 1% Et<sub>3</sub>N) to yield the white power, compound **3c** (4.8 g, yield  
73 78%).

#### 74 **1.4 Timosaponin AI (3)**

75 To a stirring solution of **3c** (0.74 g, 1.0 mmol) in 15 mL of dry CH<sub>2</sub>Cl<sub>2</sub> was added 4 Å molecular sieves  
76 (0.5-1.0 mm, 2 g) followed by sarsasapogenin (0.5 g, 1.2 mmol) as a solid powder. It was stirred for 0.5  
77 h under ice-bath, and then TMSOTf (60 µL, 0.3 mmol) was added under nitrogen (N<sub>2</sub>) protection. The

78 mixture was continuously stirred at 0 °C for 1 h and room temperature for another 0.5 h, and then  
79 neutralized with Et<sub>3</sub>N. The yellow solution was diluted with CH<sub>2</sub>Cl<sub>2</sub> and filtered to remove the  
80 molecular sieves. The organic layer was concentrated under reduced pressure to give brownish syrup,  
81 which was purified by column chromatography with petroleum ether-ethyl acetate (10:1) to afford  
82 compound **3d** (0.9 g, yield 90.5%) as a white power.

83 Compound **3d** (0.7 g, 0.7 mmol) was dissolved in MeOH-CH<sub>2</sub>Cl<sub>2</sub> (1:1, 40mL), and then 40 mg  
84 CH<sub>3</sub>ONa was added. After stirring at room temperature for 3 h, the solution was neutralized with ion-  
85 exchange resin (H<sup>+</sup>), and then filtered and concentrated. The white residue was purified by column  
86 chromatography with ethyl acetate-methanol (20:1) to afford the white solid, compound **3** (0.28 g, yield  
87 96.2%).

88 White crystalline needle; <sup>1</sup>H-NMR (400 MHz, DMSO-*d*<sub>6</sub>), δ<sub>H</sub> (ppm): 4.67 (m, 1H, H-16), 4.64 (d, *J*  
89 = 7.0 Hz, 1H, H-1'), 4.53 (m, 1H, H-2'), 4.30 (m, 2H, H-6'), 4.09 (m, 1H, H-4'), 3.89 (o, 2H, H-26, H-  
90 5'), 3.64 (m, 1H, H-3'), 3.29 (o, H, H-26), 1.00 (d, *J* = 7.1 Hz, 3H, H-21), 0.92 (d, *J* = 6.8 Hz, 3H, H-  
91 27), 0.90 (s, 3H, H-19), 0.70 (s, 3H, H-18); <sup>13</sup>C-NMR (100 MHz, DMSO-*d*<sub>6</sub>), δ<sub>C</sub> (ppm): 108.8 (C-22),  
92 101.8 (C-1'), 80.4 (C-16), 75.0 (C-3), 73.6 (C-5'), 72.7 (C-3'), 70.7 (C-2'), 68.1 (C-4'), 64.3 (C-26),  
93 61.9 (C-17), 60.4 (C-6'), 55.7 (C-14), 41.6 (C-20), 40.2 (C-13), 39.7 (C-12), 39.4 (C-9), 35.9 (C-5),  
94 34.9 (C-8), 34.6 (C-10), 31.4 (C-4), 30.1 (C-15), 29.5 (C-1), 26.5 (C-25), 26.4 (C-2), 26.2 (C-7), 26.0  
95 (C-6), 25.6 (C-23), 25.4 (C-24), 23.6 (C-19), 20.5 (C-11), 16.2 (C-27), 16.0 (C-18), 14.5 (C-21);  
96 positive-ion HR-ESI/MS *m/z*: 579.3899 [M+H]<sup>+</sup> (calcd. for C<sub>33</sub>H<sub>55</sub>O<sub>8</sub><sup>+</sup>, 579.3891).

#### 97 **1.5 Isotimosaponin AI (4)**

98 The similar procedure for the preparation of compound **3** was adopted, and thus isosarsasapogenin (0.5  
99 g, 1.2 mmol) produced compound **4** (0.26 g, yield 89.3%) as a white solid.

100 White crystalline needle; <sup>1</sup>H-NMR (400 MHz, DMSO-*d*<sub>6</sub>), δ<sub>H</sub> (ppm):4.66 (m, 1H, H-16), 4.62 (d, *J*  
101 = 7.2 Hz, 1H, H-1'), 4.51 (m, 1H, H-2'), 4.29 (m, 2H, H-6'), 4.09 (m, 1H, H-4'), 3.89 (o, H, H-5'),  
102 3.61 (m, 1H, H-3'), 3.25 (o, 2H, H-26), 0.91 (d, *J* = 19.7 Hz, 3H, H-21), 0.90 (s, 3H, H-19), 0.73 (d, *J*  
103 = 6.2 Hz, 3H, H-27), 0.71 (s, 3H, H-18).; <sup>13</sup>C-NMR (100 MHz, DMSO-*d*<sub>6</sub>), δ<sub>C</sub> (ppm): 108.4 (C-22),  
104 101.8 (C-1'), 80.3 (C-16), 75.0 (C-3), 73.6 (C-5'), 72.7 (C-3'), 70.7 (C-2'), 68.1 (C-4'), 65.9 (C-26),  
105 62.0 (C-17), 60.3 (C-6'), 55.7 (C-14), 41.4 (C-20), 40.2 (C-13), 39.7 (C-12), 39.4 (C-9), 35.9 (C-5),  
106 34.9 (C-8), 34.6 (C-10), 31.4 (C-4), 31.0 (C-23), 30.1 (C-15), 29.8 (C-25), 29.5 (C-1), 28.5 (C-24),  
107 26.4 (C-2), 26.2 (C-7), 26.0 (C-6), 23.6 (C-19), 20.5 (C-11), 17.1 (C-27), 16.2 (C-18), 14.7 (C-21);  
108 positive-ion HR-ESI/MS *m/z*: 579.3897 [M+H]<sup>+</sup> (calcd. for C<sub>33</sub>H<sub>55</sub>O<sub>8</sub><sup>+</sup>, 579.3891). It was determined to  
109 be (25*R*)-5β-spirostan-3-*O*-β-D-galactopyranoside, and simply named isotimosaponin AI.

#### 110 1.6 Timosaponin BIII-d (5)

111 A solution of timosaponin BII (2.0 g) and weak hydrochloric acid (approximately, 0.25 mol·L<sup>-1</sup>) was  
112 refluxed at 100 °C for 3 h. The reaction solution was partitioned with *n*-butanol and the *n*-butanol  
113 soluble portion was evaporated to dryness and the residue was separated by chromatography on  
114 preparative HPLC (λ=218 nm) eluting with 30% acetonitrile to afford the white powder. And it was  
115 regarded as the novel compound that had not been reported from natural sources or synthesis previous.

116 White, amorphous powder, the detail <sup>13</sup>C-NMR (pyridine-*d*<sub>5</sub>, 100MHz) and <sup>1</sup>H-NMR (pyridine-*d*<sub>5</sub>,  
117 400MHz) information see the next section Table 1; positive-ion HR-ESI/MS *m/z*: 741.4422 [M+H]<sup>+</sup>  
118 (calcd. for C<sub>39</sub>H<sub>65</sub>O<sub>13</sub><sup>+</sup>, 741.4420). It was determined to be (25*S*)-26-*O*-β-D-glucopyranosyl -20(22)-  
119 ene-5β-furost-3-*O*-β-D-galactopyranoside.

120  
121

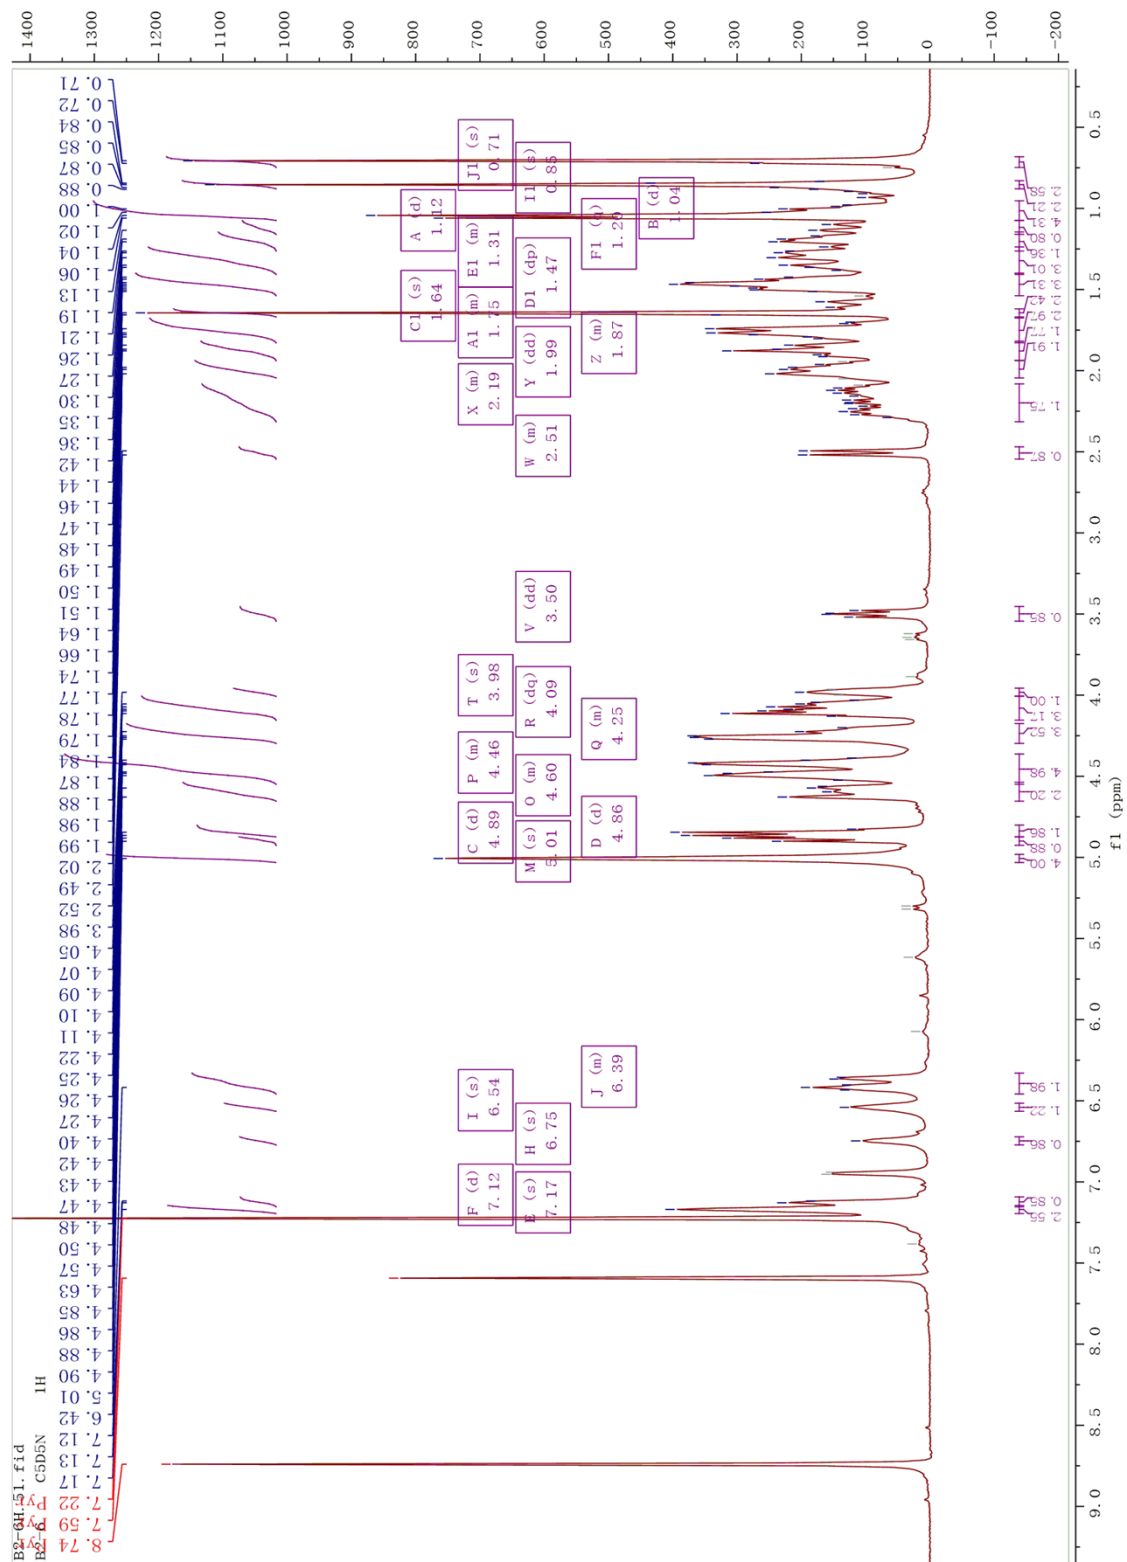

**Fig. S1** The  $^1\text{H}$ -NMR spectra of timosaponin BIII-d (400 MHz, in pyridine- $d_5$ )

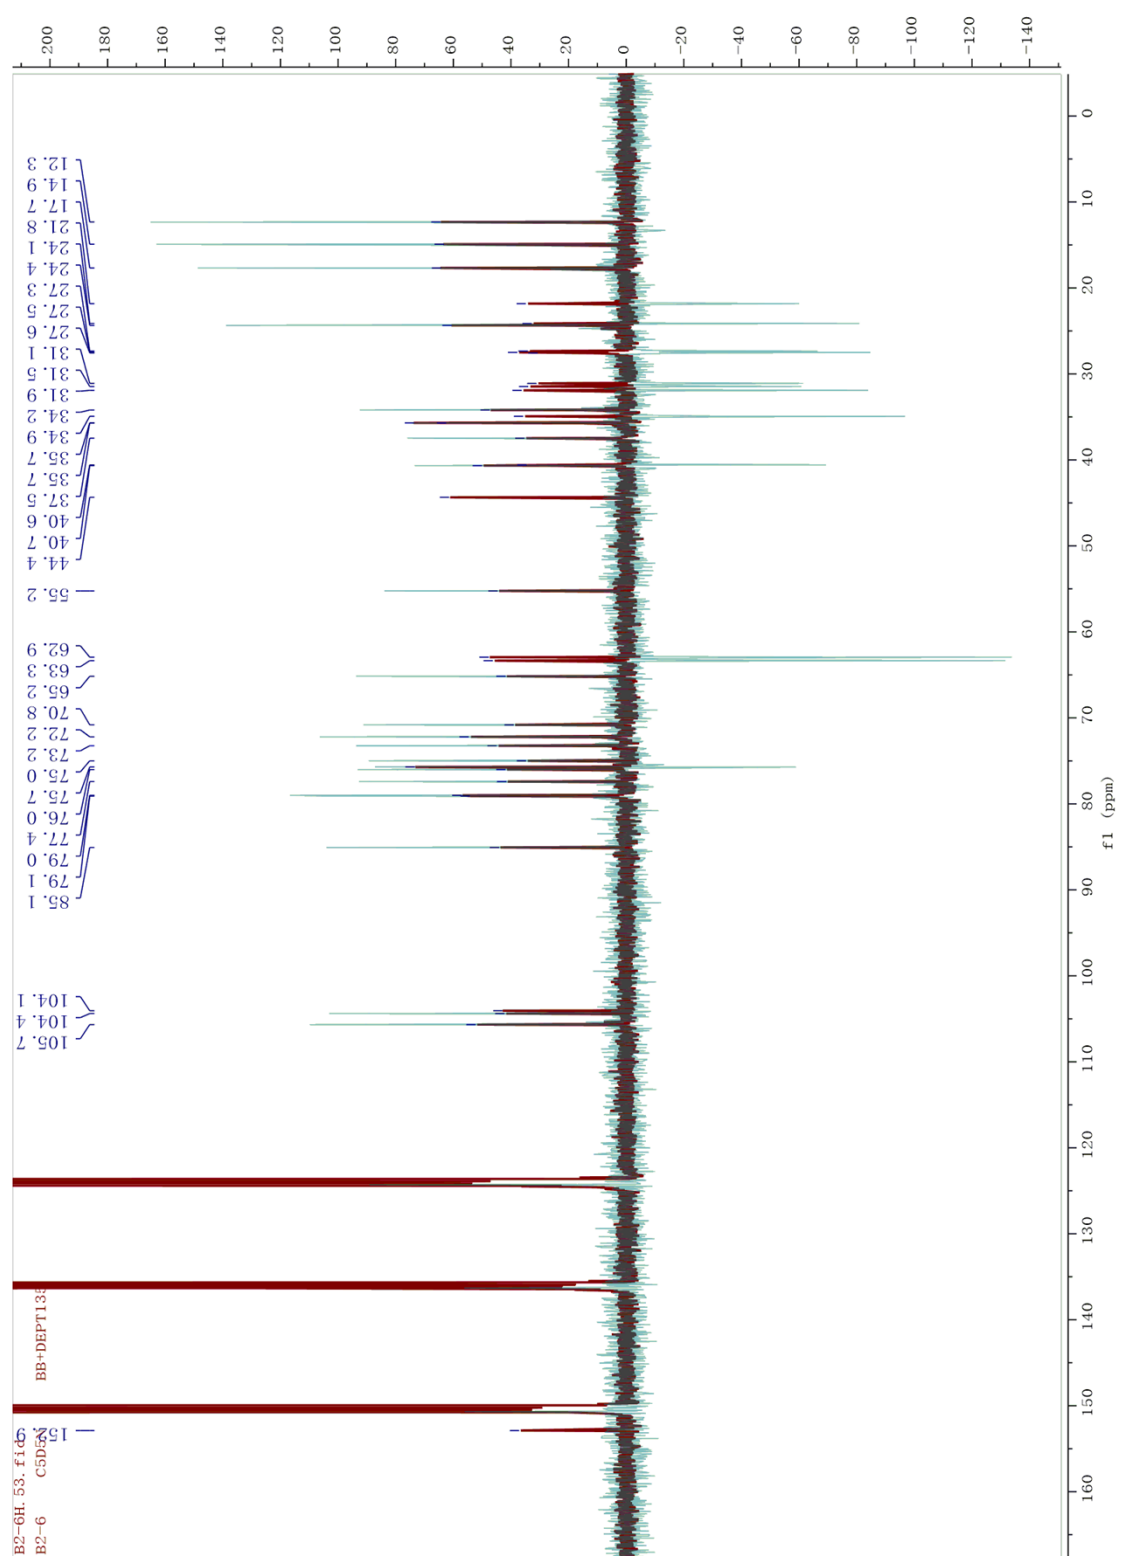

122  
123  
124

**Fig. S2** The superposition of  $^{13}\text{C}$ -NMR spectra of timosaponin BIII-d (100 MHz, in pyridine- $d_5$ ): brownish for BB and blue for DEPT-135.



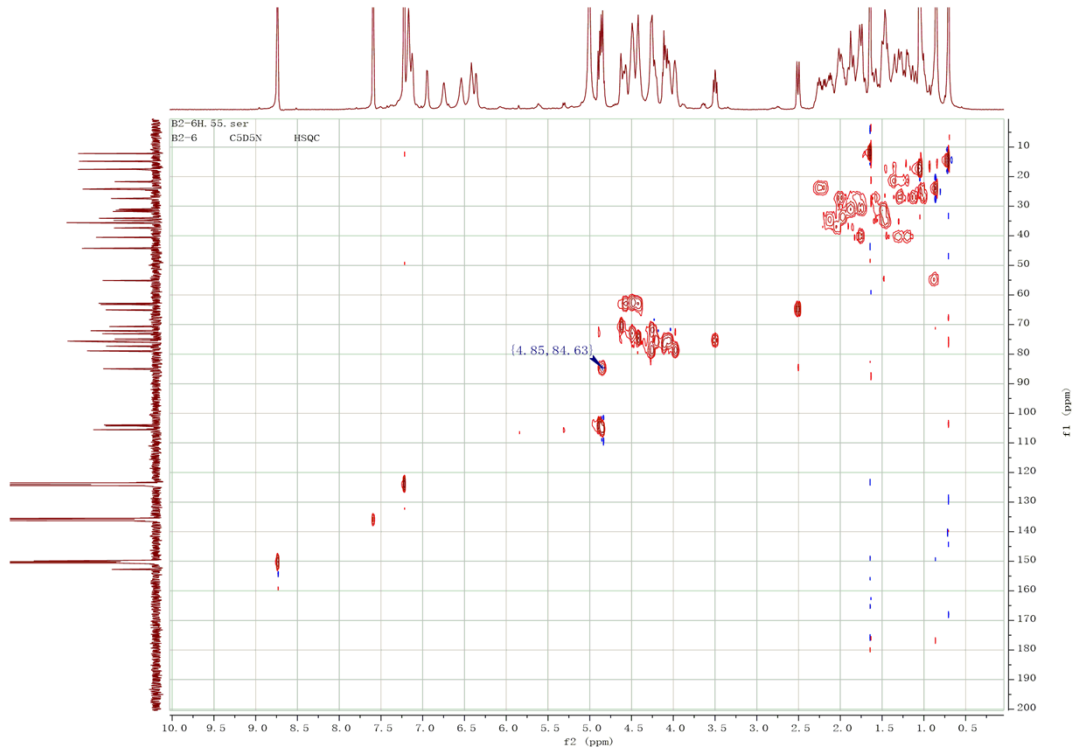

125

126

**Fig. S3** The HSQC spectra of timosaponin BIII-d

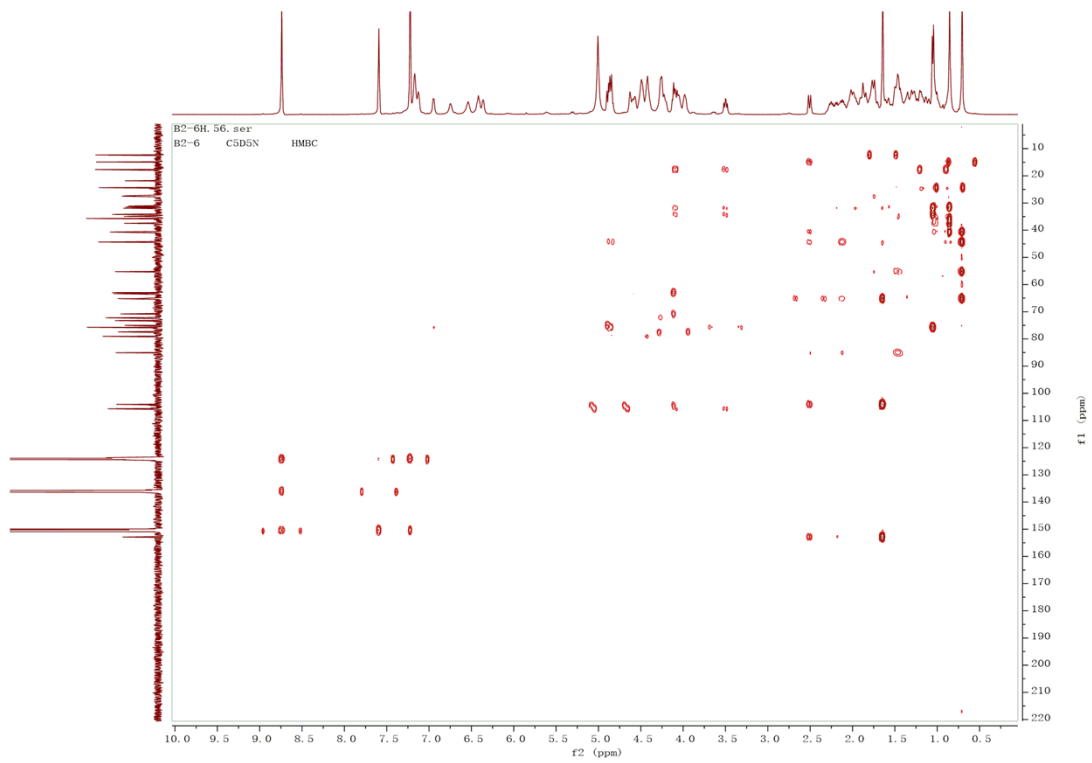

127

128

129

**Fig. S4** The HMBC spectra of timosaponin BIII-d

130  
131

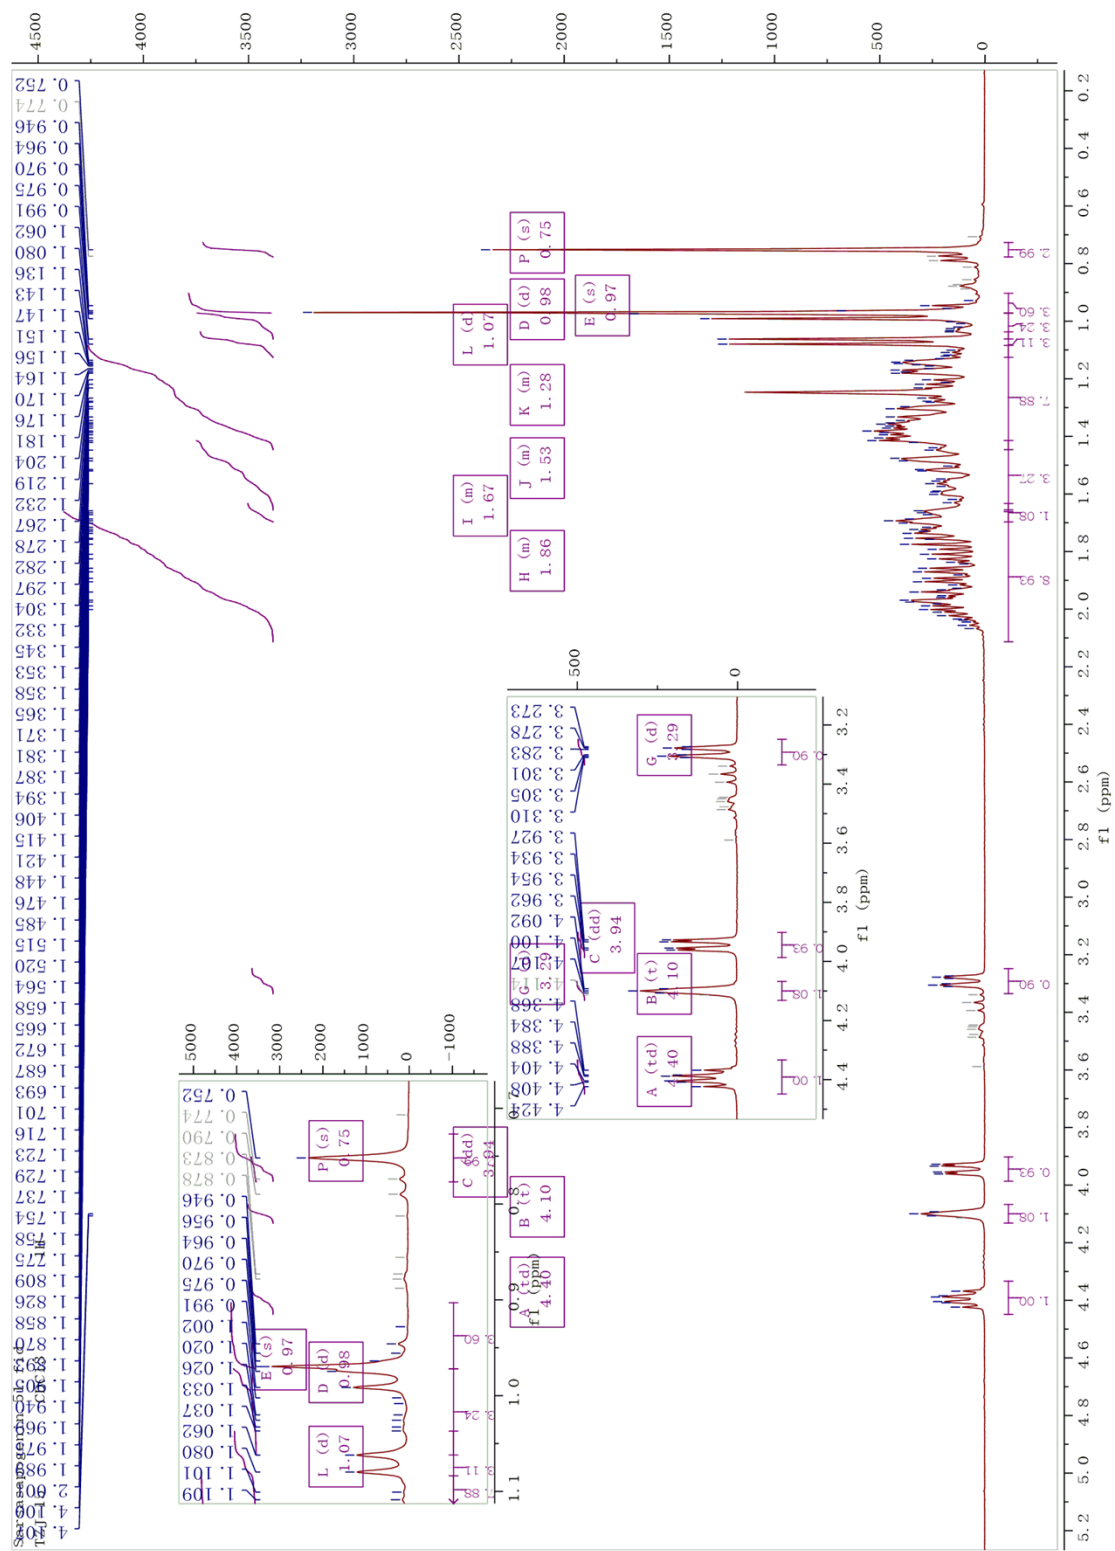

Fig. S5 The <sup>1</sup>H-NMR spectra of Sarsasapogenin (400 MHz, in chloroform-d)

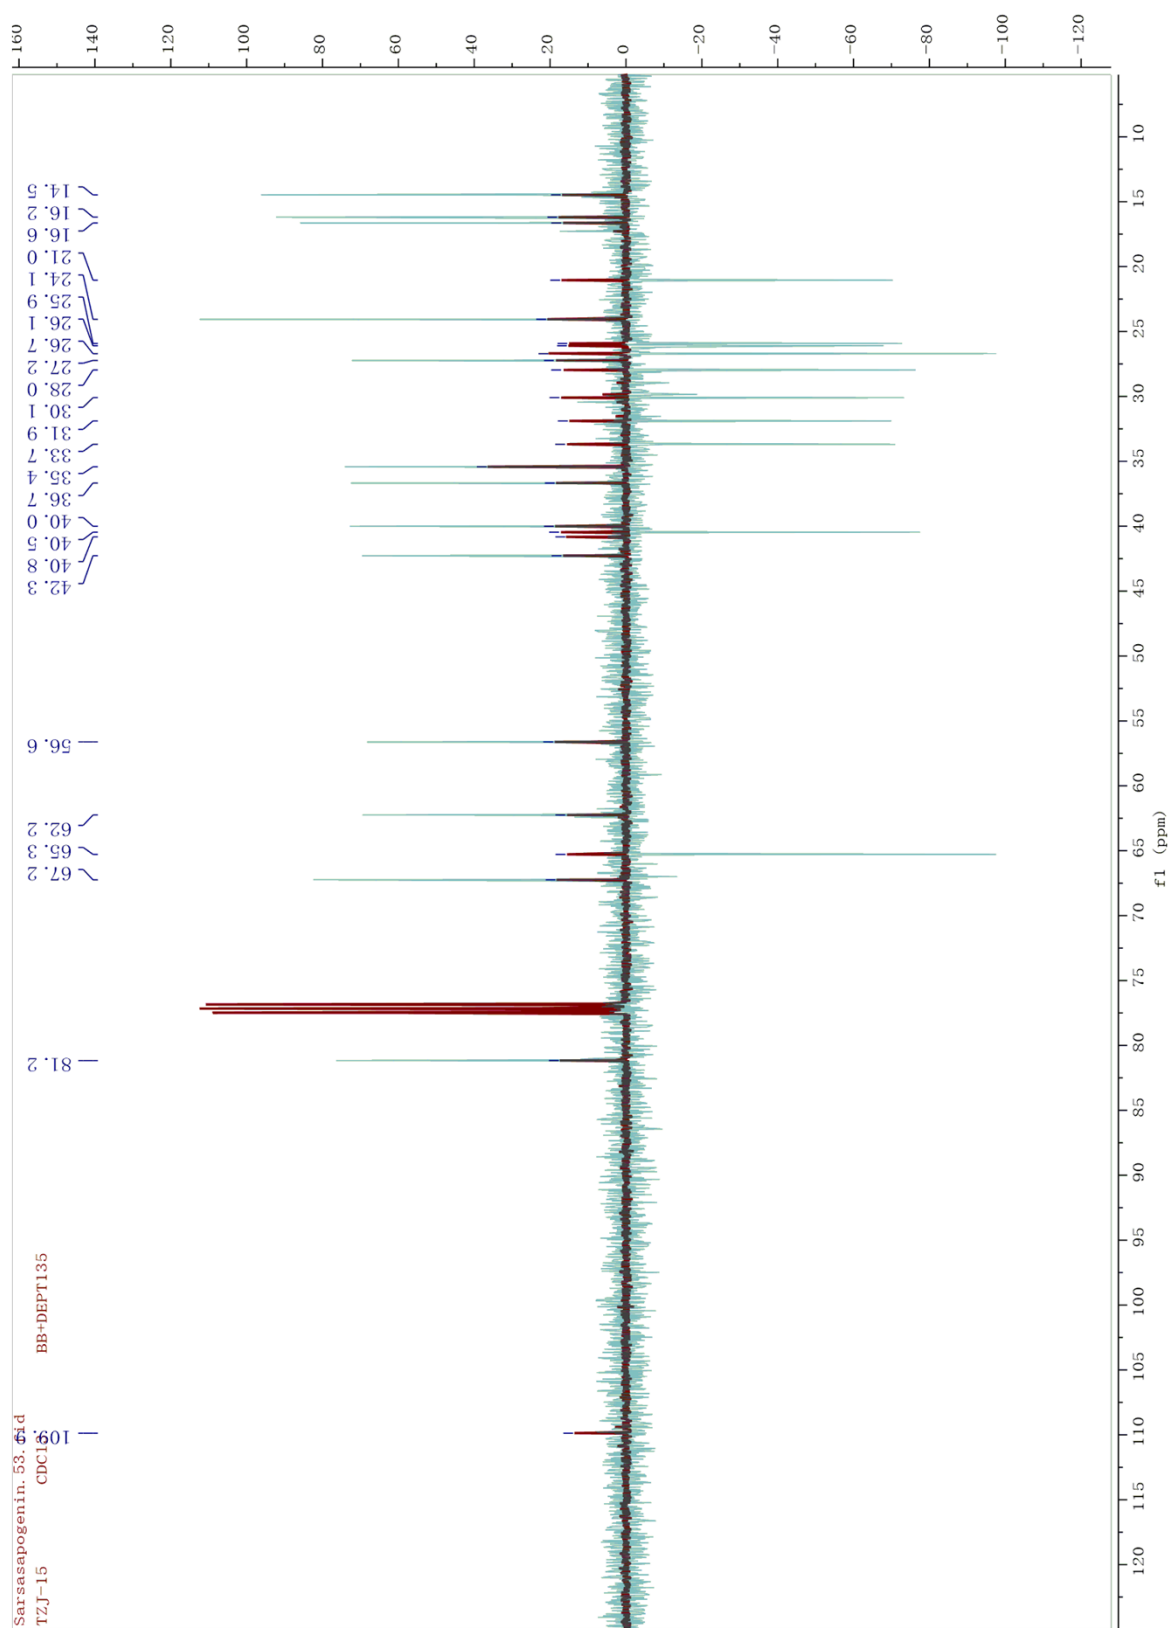

132

133 **Fig. S6** The superposition of  $^{13}\text{C}$ -NMR spectra of Sarsasapogenin (100 MHz, in chloroform-*d*):  
134 brownish for BB and blue for DEPT-135.

135  
136

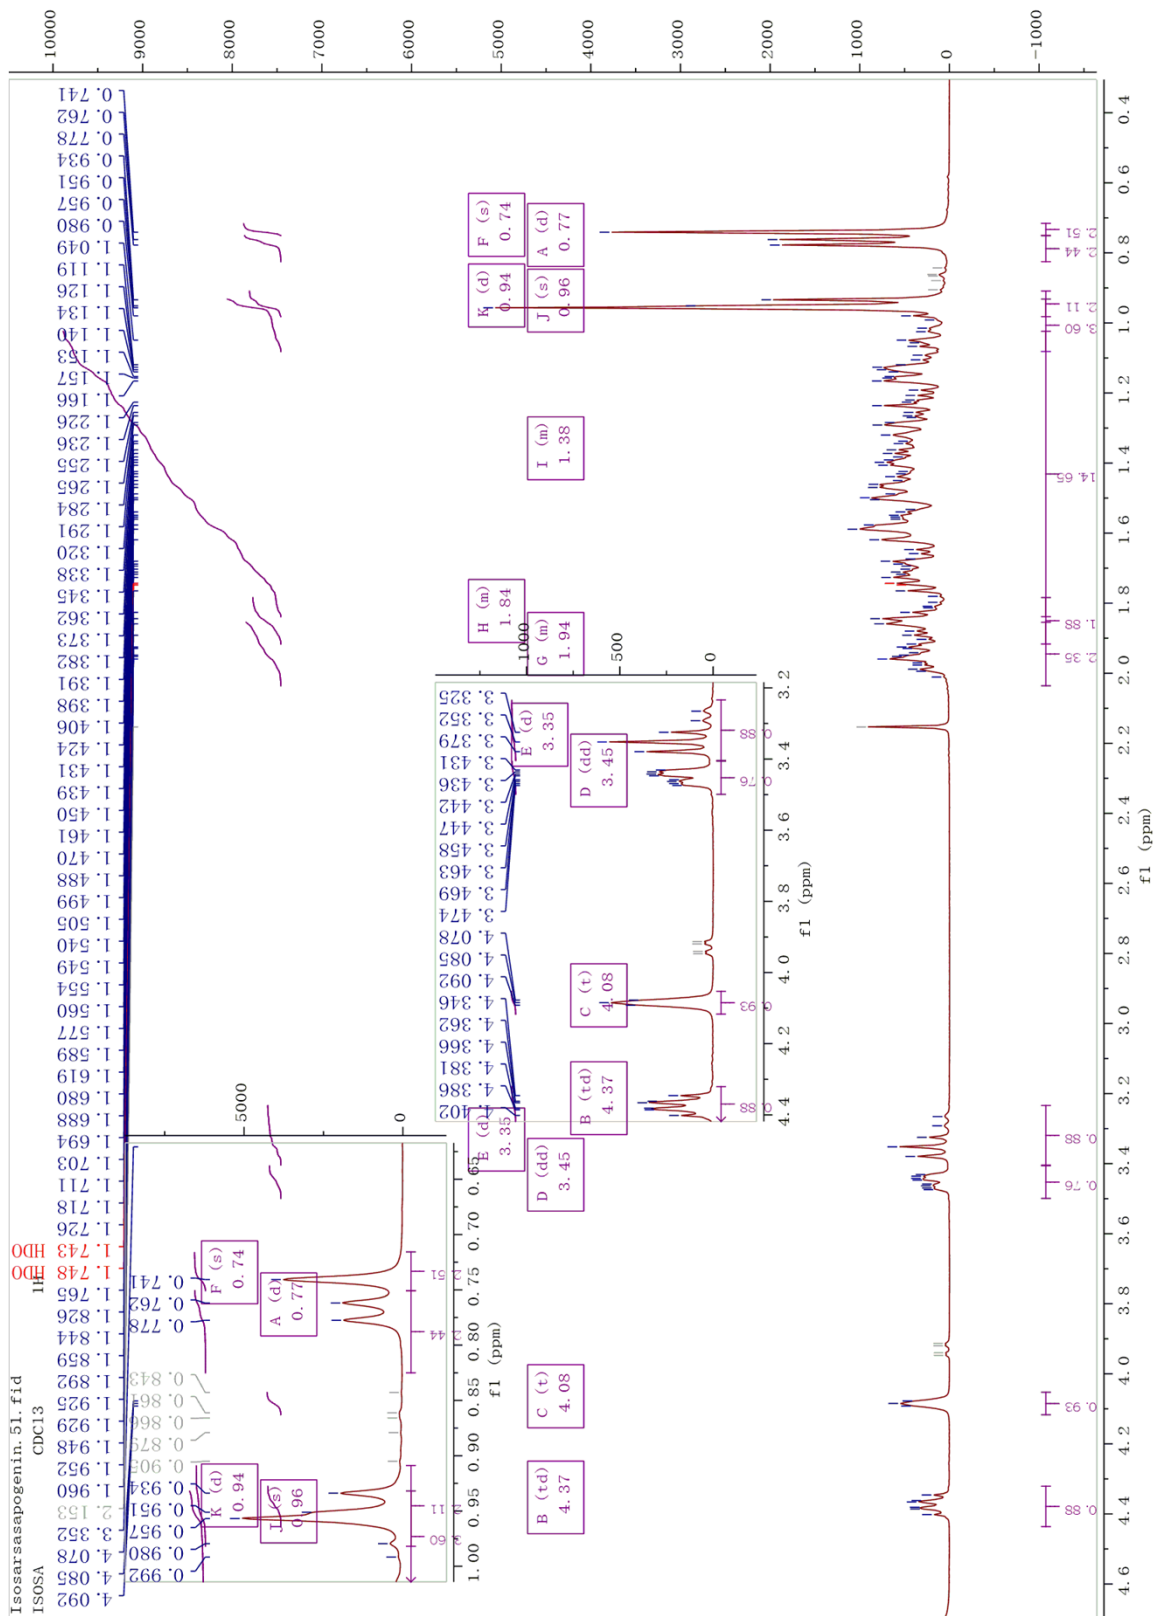

Fig. S7 The <sup>1</sup>H-NMR spectra of Isosarsasapogenin (400 MHz, in chloroform-*d*)

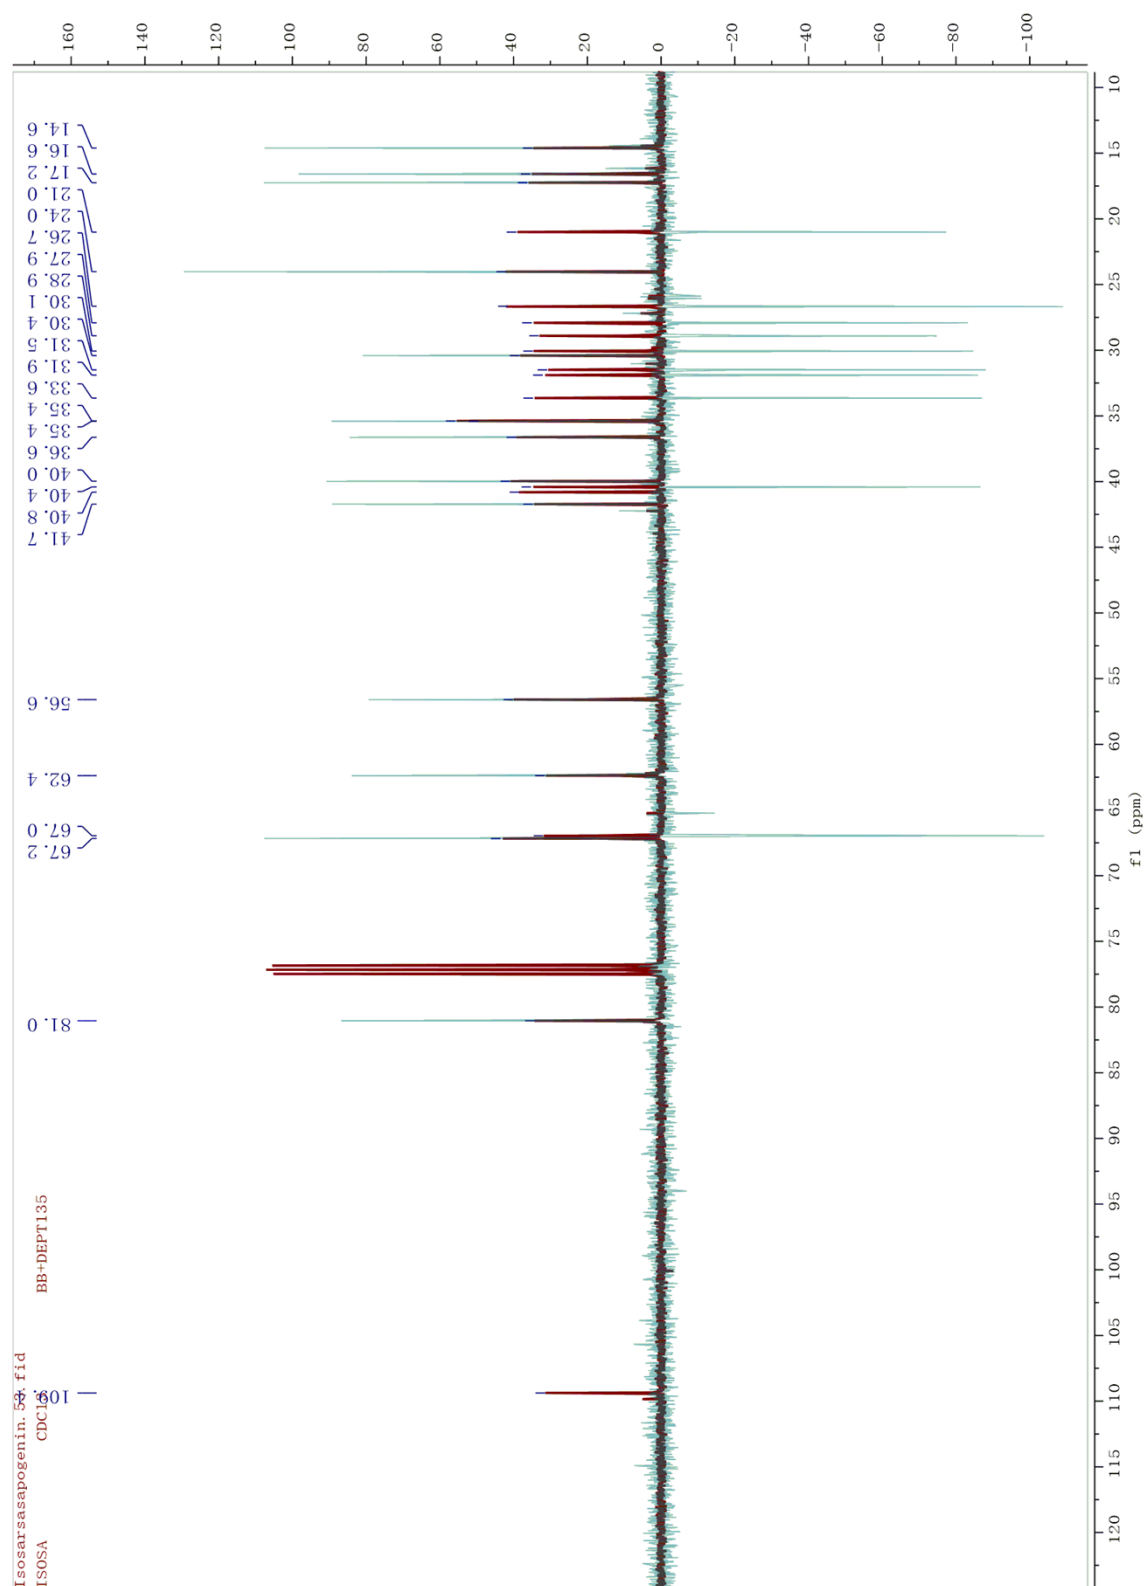

137

138 **Fig. S8** The superposition of  $^{13}\text{C}$ -NMR spectra of Isosarsasapogenin (100 MHz, in chloroform-*d*):

139

brownish for BB and blue for DEPT-135.

140

141

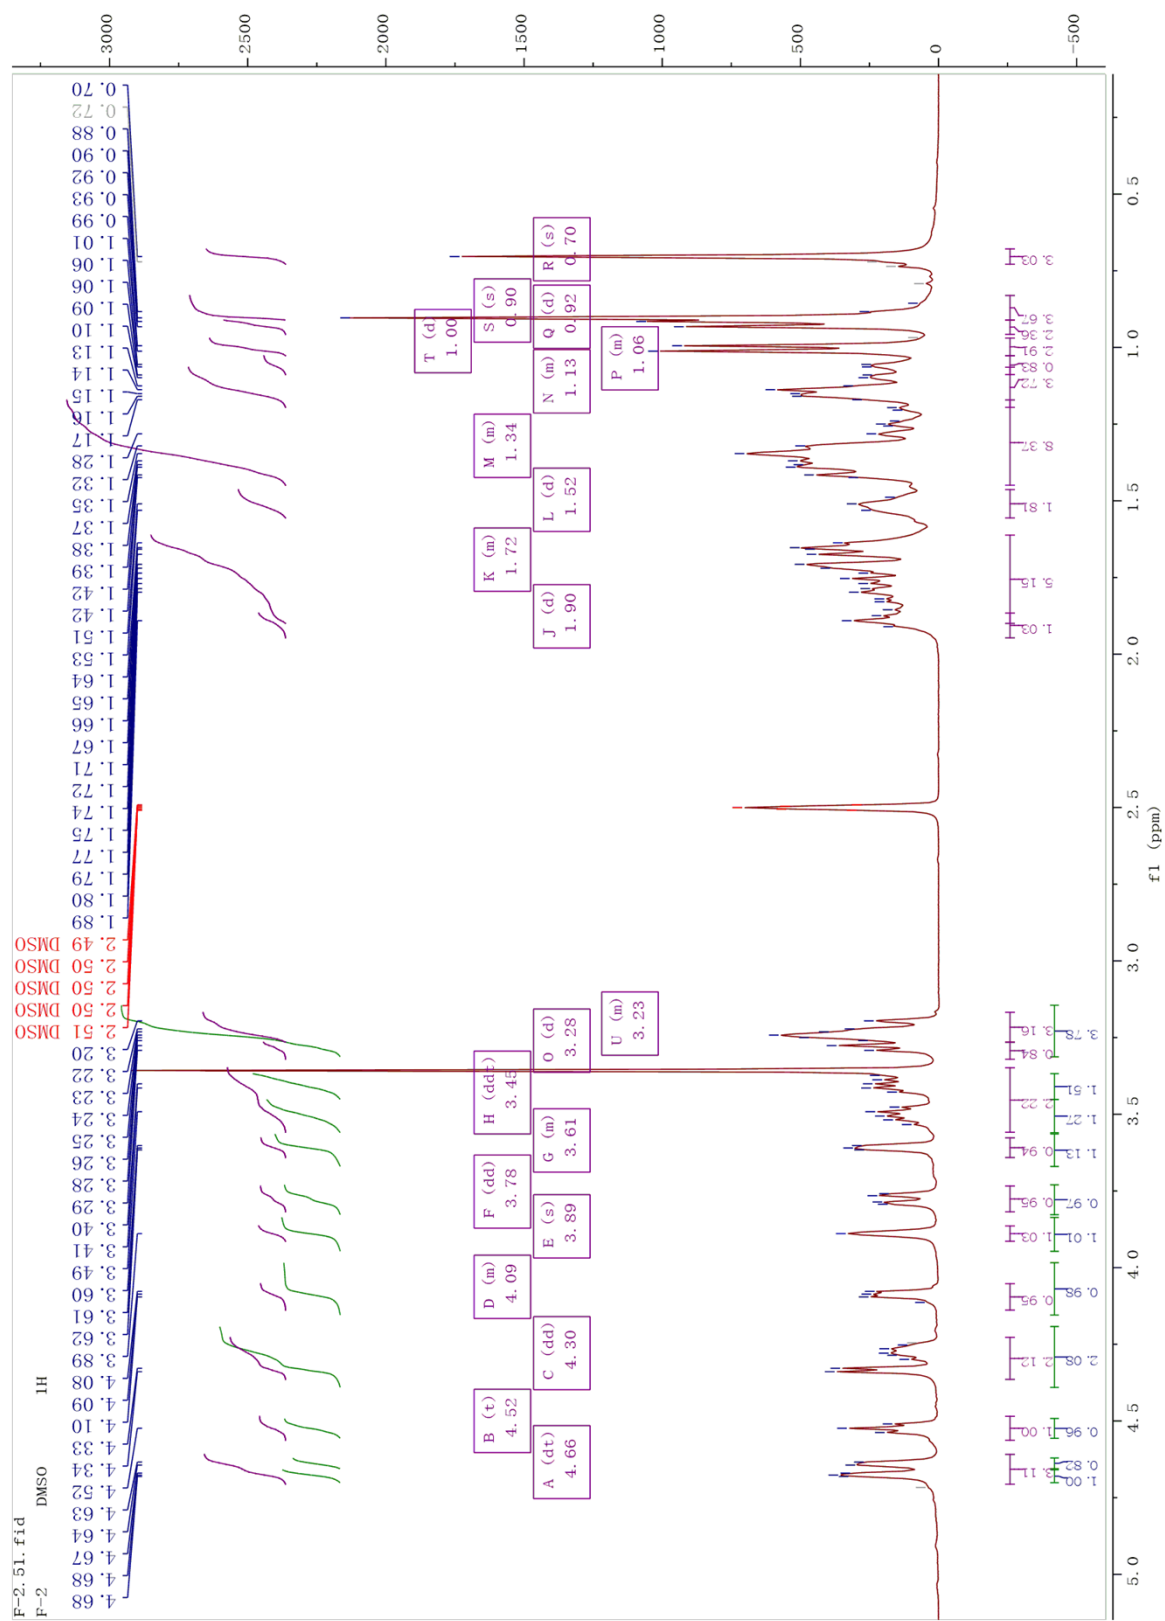

Fig. S9 The  $^1\text{H}$ -NMR spectra of Timosaponin A-I (400 MHz, in  $\text{DMSO}-d_6$ )

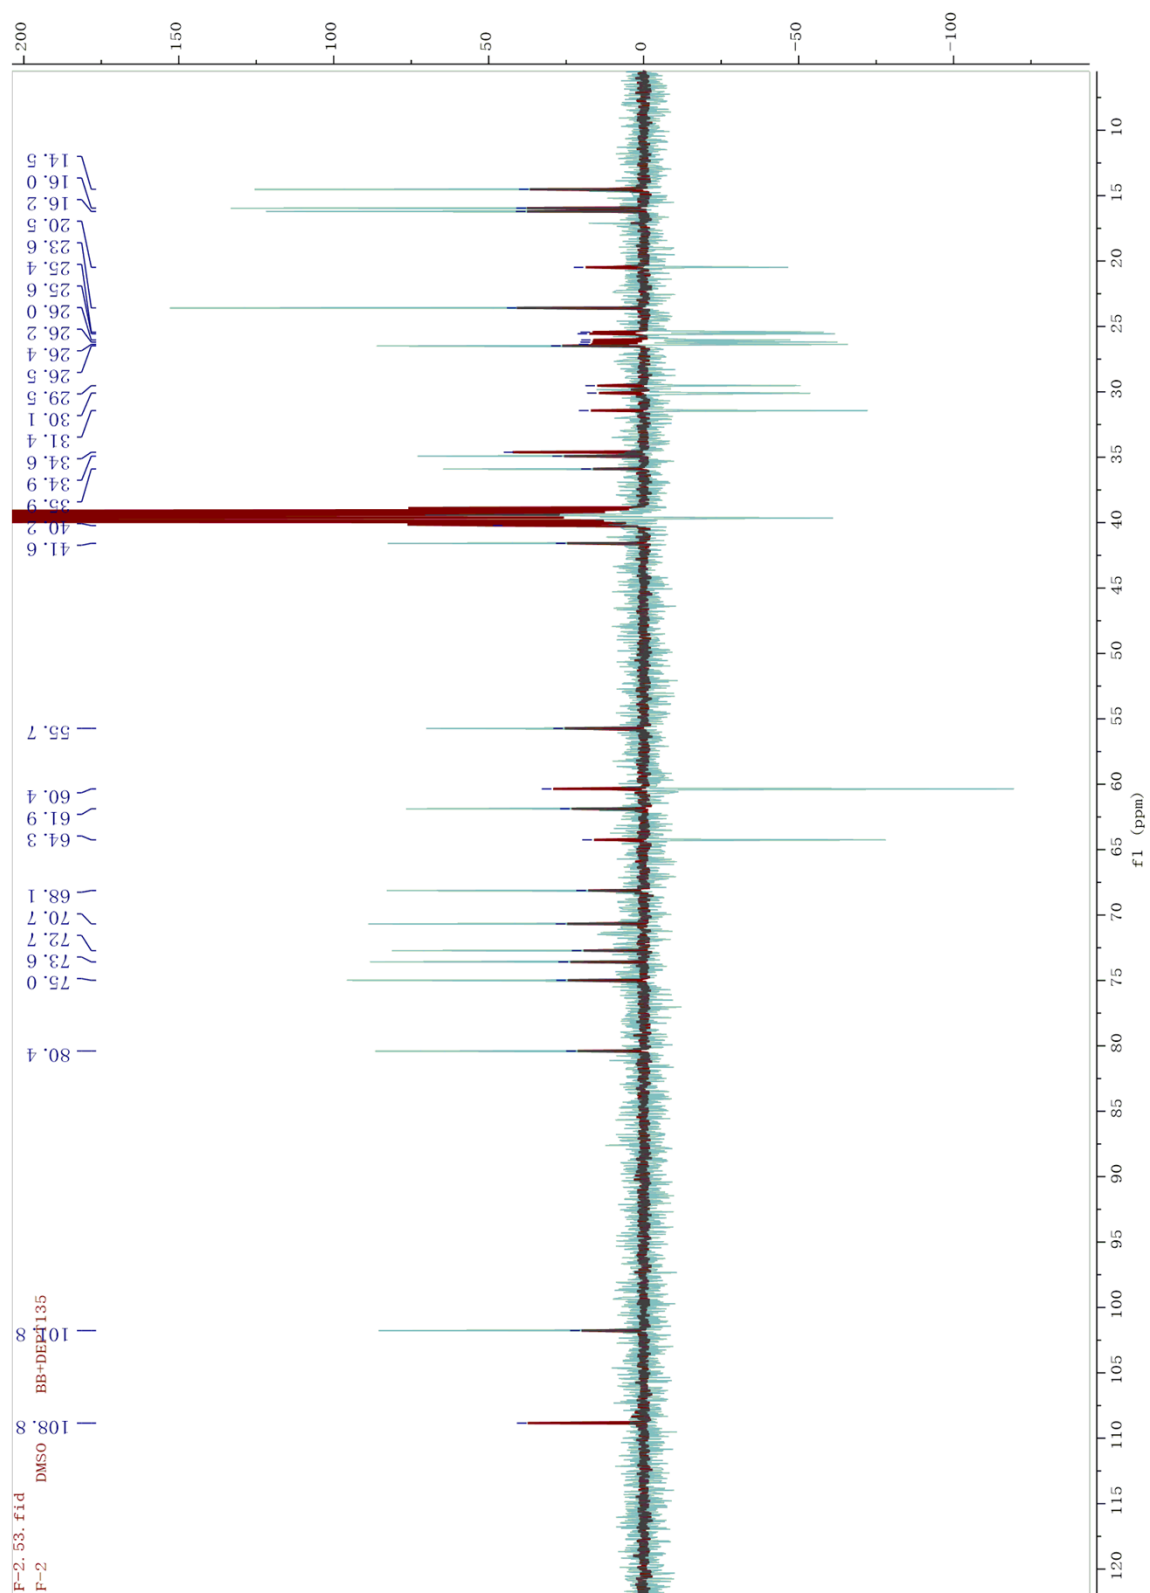

142  
143  
144

**Fig. S10** The superposition of  $^{13}\text{C}$ -NMR spectra of Timosaponin A-I (100 MHz, in  $\text{DMSO-}d_6$ ): brownish for BB and blue for DEPT-135.

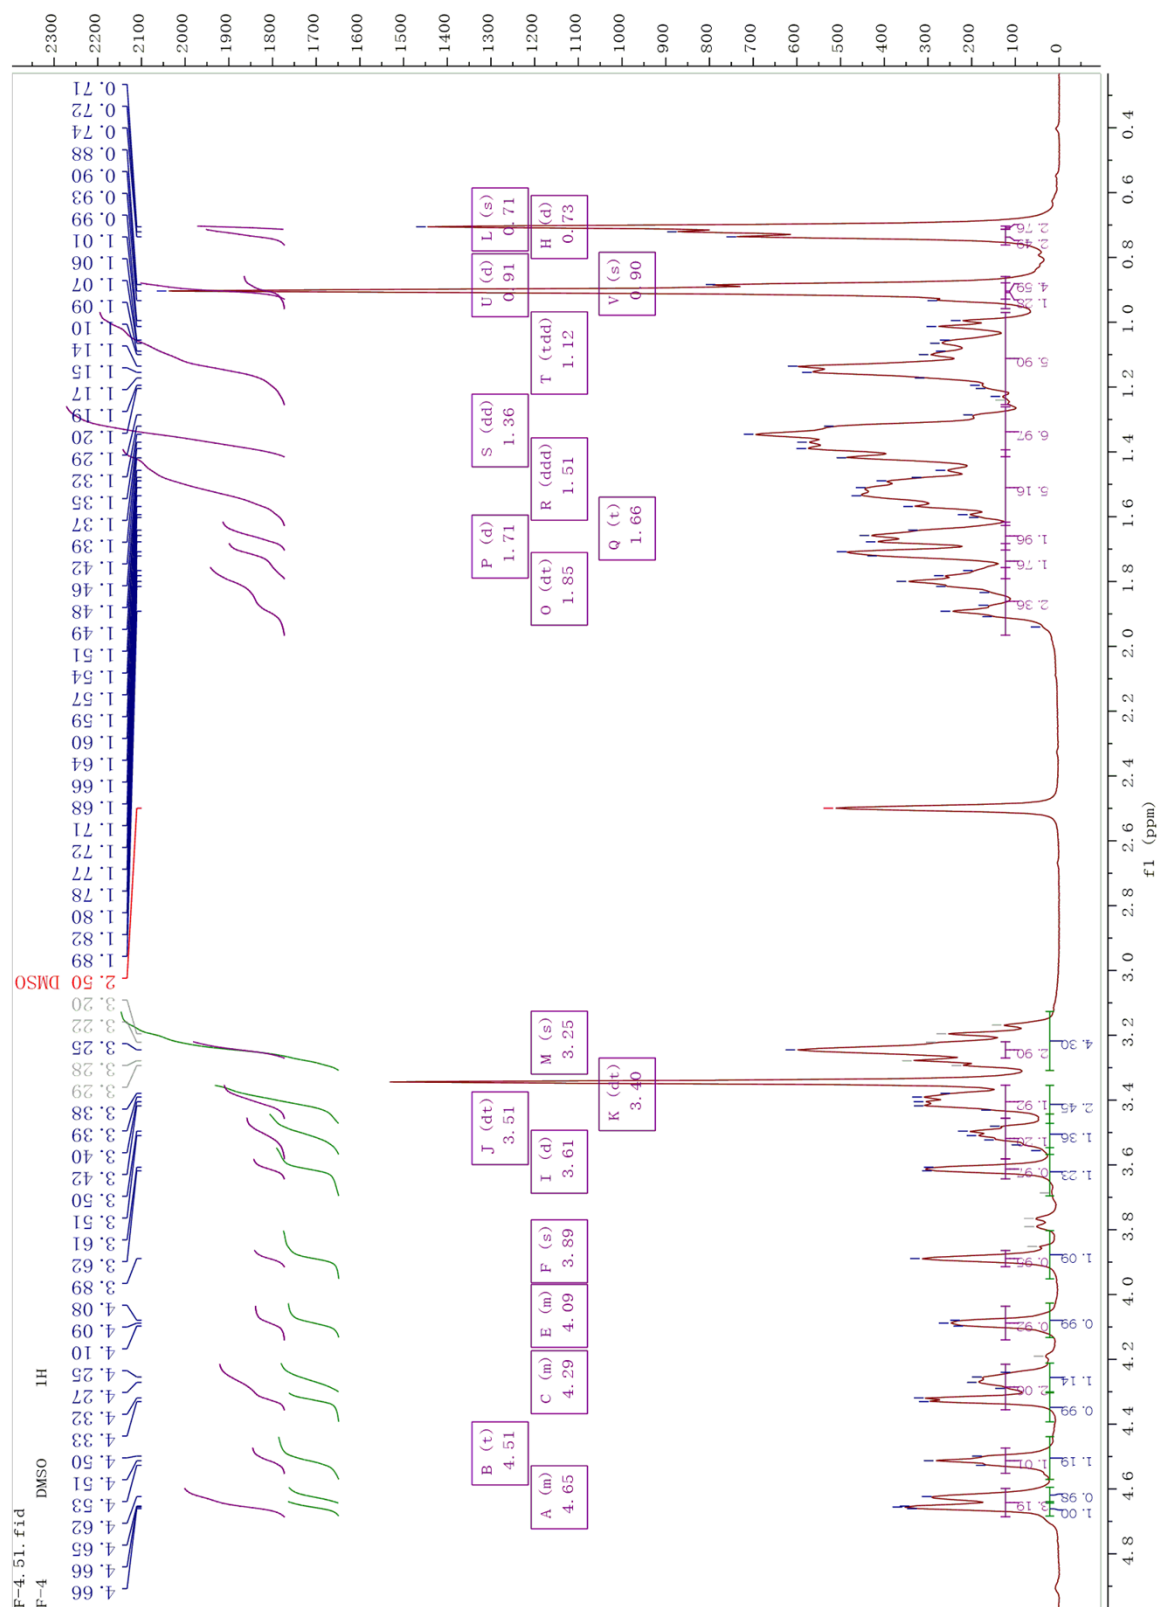

Fig. S11 The  $^1\text{H}$ -NMR spectra of Isotimosaponin A-I (400 MHz, in  $\text{DMSO-}d_6$ )

145  
146



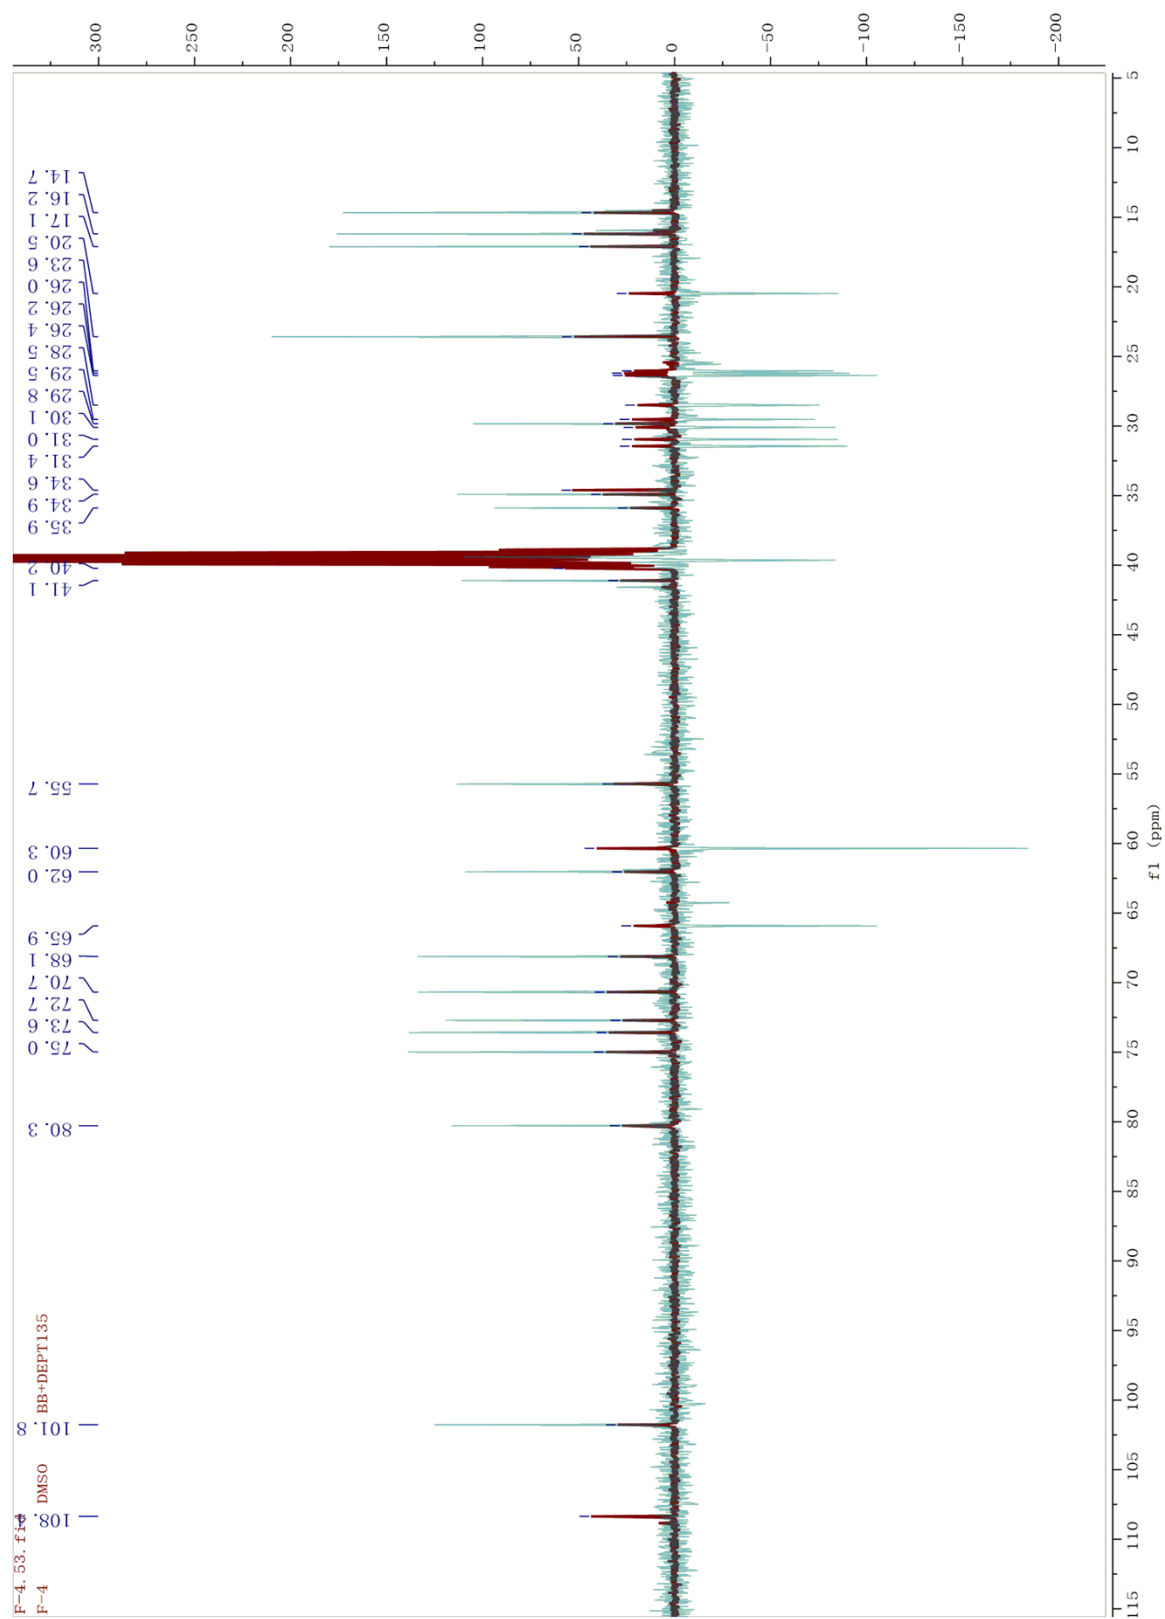

147

148 **Fig. S12** The superposition of  $^{13}\text{C}$ -NMR spectra of Isotimosaponin A-I (100 MHz, in  $\text{DMSO}-d_6$ ):  
 149 brownish for BB and blue for DEPT-135.

150

151

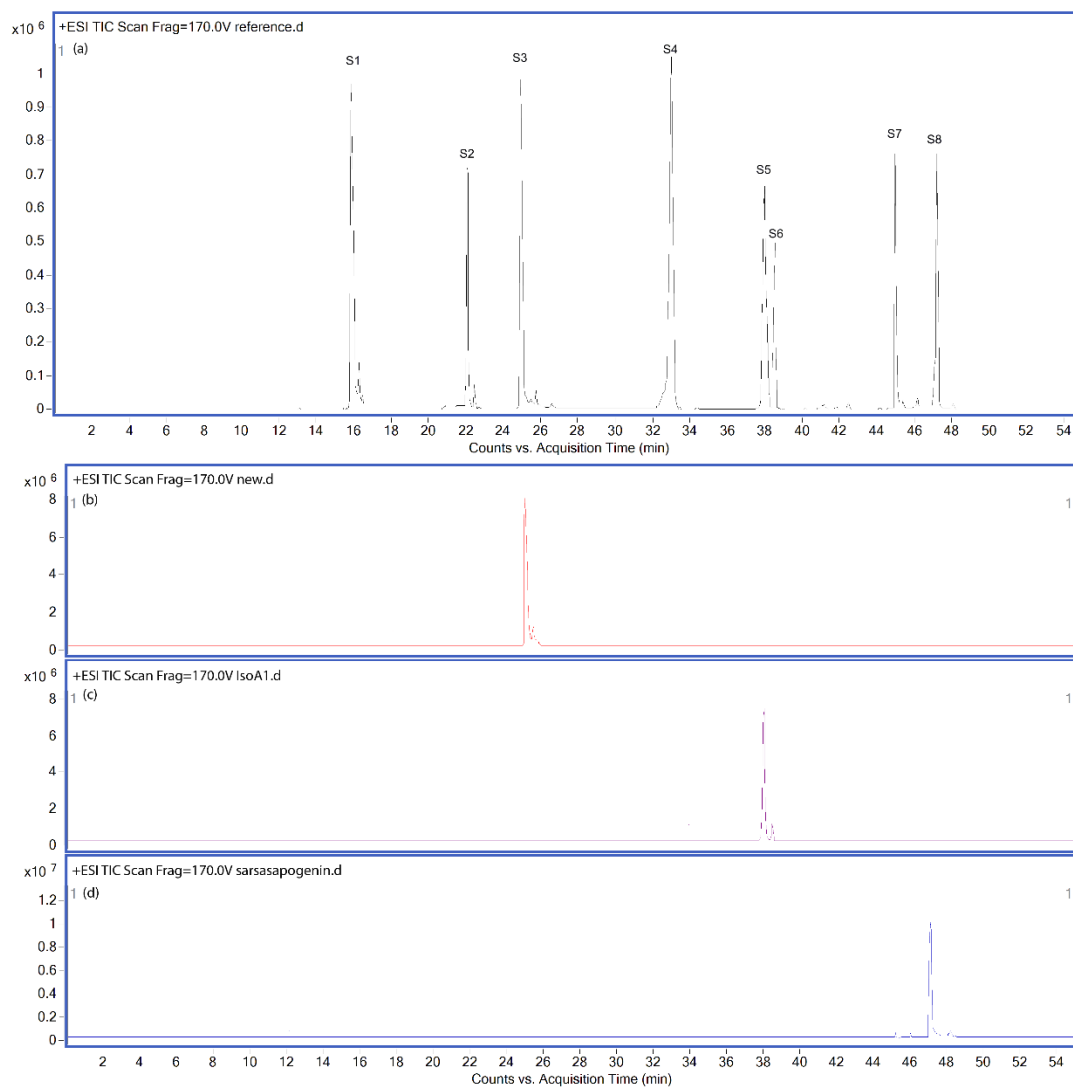

152

153 **Fig. S13** Total ion chromatograms for eight reference compounds (a), the single injection analysis  
154 of timosaponin BIII-d (b), isotimosaponin A-I (c), and sarsasapogenin (d) in positive mode.

155
